# Supplementary material for: High Levels of Microplastics in the Arctic Sea Ice Alga Melosira arctica, a Vector to Ice-Associated and Benthic Food Webs
Source: PubMed Central journal article supplement (PMC10157888; doi:10.1021/acs.est.2c08010), 2023-04-21
Supplement: es2c08010_si_001.pdf [file es2c08010_si_001.pdf]

# Supporting Information for

## High levels of microplastics in the Arctic sea ice alga *Melosira arctica*, a vector to ice-associated and benthic food webs

Melanie Bergmann, <sup>1\*</sup>, Steve Allen, <sup>2</sup>, Thomas Krumpen, <sup>3</sup>, Deonie Allen, <sup>4,5</sup>

<sup>1\*</sup>HGF-MPG Group for Deep Sea Ecology and Technology, Alfred-Wegener-Institut Helmholtz-Zentrum für Polar- und Meeresforschung (Melanie.Bergmann@awi.de)

<sup>2</sup>Ocean Frontiers Institute, Dalhousie University, Nova Scotia

<sup>3</sup>Sea Ice Physics, Alfred-Wegener-Institut Helmholtz-Zentrum für Polar- und Meeresforschung

<sup>4</sup>School of Geography, Earth and Environmental Science, University of Birmingham

<sup>5</sup>School of Physical and Chemical Sciences, University of Canterbury

### This file includes:

- Table S1. MP counts detected in *Melosira arctica* samples.
- Table S2. MP counts detected in *Melosira arctica* and sea water samples as mean results representation for the sample location (MP m<sup>-3</sup>).
- Table S3. MP polymer types as percentage of the total particle count detected in *Melosira arctica* and sea water.
- Table S4. Particle size distribution (in percentages per bin) for *Melosira arctica*.
- Note S1. Kruskal–Wallis test is the one-way analysis of variance between *Melosira arctica* MP sample sites for MP relative to wet sample weight, dry sample weight and sample volume (MP m<sup>-3</sup>).
- Note S2. t-Test of *Melosira arctica* individual samples to consider location specific differences and differences between *Melosira* and seawater samples.
- Note S3. Correlation and simple linear regression analysis of *Melosira* and sea water samples.
- Note S4. Positive control tests.

**Table S1. MP counts detected in *Melosira arctica* samples.** Sample counts are derived from  $\mu$ -Raman spectra identification of MP particles.

| Sample ID   | PE | PES | PET | PP | PS | PVC | PU | ABS | PC | PVA | Nylon/PA | Acrylic | CE | PMMA | PLS | Rbr | PLA | SBR | SAN | Total MP Count | Total extrapolated filter count | Sample Wet Weight (g) | MP/g (wet weight) | Sample Dry Weight (g) | MP/g (dry weight) | Sample volume (m3) | MP/m3 |  |
|-------------|----|-----|-----|----|----|-----|----|-----|----|-----|----------|---------|----|------|-----|-----|-----|-----|-----|----------------|---------------------------------|-----------------------|-------------------|-----------------------|-------------------|--------------------|-------|--|
| MEL_1       | 5  | 8   | 5   | 0  | 2  | 1   | 0  | 0   | 1  | 6   | 4        | 7       | 3  | 5    | 4   | 0   | 2   | 0   | 1   | 54             | 216                             | 3.3                   | 66.1              | 0.61                  | 355               | 0.002935           | 73593 |  |
| MEL_1       | 3  | 5   | 0   | 0  | 1  | 0   | 0  | 0   | 0  | 4   | 0        | 2       | 3  | 2    | 3   | 0   | 1   | 0   | 2   | 26             | 104                             | 3.3                   | 31.8              | 0.61                  | 171               | 0.002935           | 35435 |  |
| MEL_1       | 3  | 5   | 5   | 0  | 1  | 0   | 0  | 0   | 0  | 4   | 2        | 2       | 3  | 2    | 3   | 0   | 1   | 1   | 2   | 34             | 136                             | 3.3                   | 41.6              | 0.61                  | 223               | 0.002936           | 46319 |  |
| MEL_1       | 5  | 8   | 4   | 0  | 2  | 1   | 0  | 0   | 1  | 6   | 3        | 7       | 3  | 5    | 4   | 0   | 2   | 1   | 2   | 54             | 216                             | 3.3                   | 66.2              | 0.61                  | 355               | 0.002931           | 73701 |  |
| MEL_2       | 6  | 3   | 6   | 0  | 0  | 2   | 0  | 1   | 1  | 4   | 2        | 6       | 2  | 4    | 7   | 0   | 2   | 0   | 2   | 48             | 192                             | 7.7                   | 25.0              | 0.58                  | 330               | 0.006906           | 27803 |  |
| MEL_2       | 1  | 0   | 5   | 0  | 0  | 1   | 0  | 0   | 0  | 0   | 1        | 1       | 1  | 1    | 1   | 0   | 1   | 0   | 1   | 14             | 56                              | 7.7                   | 7.3               | 0.58                  | 96                | 0.006905           | 8110  |  |
| MEL_2       | 1  | 0   | 2   | 0  | 0  | 0   | 0  | 0   | 0  | 0   | 0        | 1       | 1  | 1    | 1   | 0   | 1   | 0   | 1   | 9              | 36                              | 7.7                   | 4.7               | 0.58                  | 62                | 0.006899           | 5218  |  |
| MEL_2       | 2  | 1   | 2   | 0  | 0  | 1   | 0  | 0   | 0  | 2   | 1        | 3       | 1  | 2    | 3   | 0   | 1   | 0   | 1   | 20             | 80                              | 7.7                   | 10.4              | 0.58                  | 138               | 0.006899           | 11595 |  |
| MEL_3       | 3  | 4   | 6   | 1  | 2  | 0   | 1  | 0   | 0  | 3   | 5        | 6       | 2  | 7    | 2   | 1   | 1   | 1   | 2   | 47             | 188                             | 7.2                   | 26.0              | 0.57                  | 328               | 0.0065             | 28921 |  |
| MEL_3       | 1  | 2   | 0   | 0  | 0  | 0   | 0  | 0   | 0  | 3   | 0        | 3       | 0  | 2    | 1   | 0   | 1   | 0   | 2   | 15             | 60                              | 7.2                   | 8.3               | 0.57                  | 105               | 0.0065             | 9230  |  |
| MEL_3       | 3  | 4   | 5   | 1  | 2  | 0   | 1  | 0   | 0  | 4   | 4        | 6       | 2  | 7    | 3   | 0   | 1   | 1   | 3   | 47             | 188                             | 7.2                   | 26.0              | 0.57                  | 328               | 0.006503           | 28911 |  |
| MEL_3       | 1  | 2   | 5   | 1  | 0  | 1   | 0  | 0   | 0  | 3   | 10       | 3       | 0  | 2    | 1   | 0   | 1   | 0   | 2   | 32             | 128                             | 7.2                   | 17.7              | 0.57                  | 224               | 0.006499           | 19695 |  |
| blank_MEL_1 | 1  | 0   | 0   | 1  | 1  | 0   | 1  | 0   | 0  | 0   | 0        | 0       | 0  | 0    | 0   | 0   | 0   | 0   | 0   | 4              |                                 |                       |                   |                       |                   |                    |       |  |
| blank_MEL_2 | 1  | 0   | 1   | 0  | 1  | 0   | 0  | 0   | 0  | 0   | 0        | 0       | 0  | 0    | 0   | 0   | 0   | 0   | 0   | 3              |                                 |                       |                   |                       |                   |                    |       |  |
| blank_MEL_3 | 0  | 1   | 0   | 1  | 1  | 0   | 1  | 0   | 0  | 0   | 0        | 0       | 0  | 0    | 0   | 0   | 0   | 0   | 0   | 4              |                                 |                       |                   |                       |                   |                    |       |  |
| blank_MEL_4 | 2  | 2   | 0   | 1  | 2  | 0   | 2  | 0   | 0  | 0   | 0        | 0       | 0  | 0    | 0   | 0   | 0   | 0   | 0   | 9              |                                 |                       |                   |                       |                   |                    |       |  |

**Table S2. MP counts detected in *Melosira arctica* and sea water samples as mean results representation for the sample location (MP m<sup>-3</sup>). Sample counts are derived from  $\mu$ -Raman spectra identification of MP particles.**

|          | MP/m3<br>(mean) | StDev   | 10th<br>Percentile | 90th<br>Percentile |
|----------|-----------------|---------|--------------------|--------------------|
| MEL_1    | 5.7E+04         | 1.7E+04 | 38700              | 73668              |
| MEL_2    | 1.3E+04         | 8.7E+03 | 6086               | 22941              |
| MEL_3    | 2.2E+04         | 8.1E+03 | 12370              | 28918              |
| MEL Mean | 3.1E+04         | 1.9E+04 | 8222               | 70865              |
| SW_1     | 4.5E+03         | 1.5E+03 | 3030               | 5967               |
| SW_2     | 1.4E+03         | 1.0E+03 | 264                | 2392               |
| SW_2     | 2.5E+03         | 2.8E+02 | 2192               | 2727               |
| SW Mean  | 2.8E+03         | 1.3E+03 | 1593               | 4095               |

**Table S3. MP polymer types as percentage of the total particle count detected in *Melosira arctica* and sea water.** Polymers identified include: polyethylene (PE), polyester (PES), polyethylene terephthalate (PET), polypropylene (PP), polystyrene (PS), polyvinyl chloride (PVC), polyurethane (PU), acrylonitrile butadiene styrene (ABS), polycarbonate (PC), polyethylene vinyl acetate (PVA), nylon, polyamide (PA), acrylic, cellulose acetate (CE), polymethyl methacrylate (PMMA), polysulfone (PLS), rubber, polylactic acid (PLA), styrene butadiene (SBT), styrene acrylonitrile copolymer (SAN).

Blank corrected *Melosira* Mean MP counts

| Sample ID       | PE  | PES | PET | PP | PS | PVC | PU | ABS | PC | PVA | Nylon/PA | Acrylic | CE  | PMMA | PLS | Rbr | PLA | SBR | SAN |
|-----------------|-----|-----|-----|----|----|-----|----|-----|----|-----|----------|---------|-----|------|-----|-----|-----|-----|-----|
| MEL_1           | 10% | 16% | 8%  | 0% | 4% | 1%  | 0% | 0%  | 1% | 12% | 5%       | 10%     | 8%  | 8%   | 9%  | 0%  | 4%  | 1%  | 5%  |
| MEL_2           | 10% | 3%  | 20% | 0% | 0% | 4%  | 0% | 1%  | 1% | 5%  | 4%       | 11%     | 7%  | 9%   | 12% | 0%  | 7%  | 0%  | 7%  |
| MEL_3           | 6%  | 9%  | 10% | 2% | 2% | 1%  | 1% | 0%  | 0% | 11% | 13%      | 14%     | 2%  | 12%  | 5%  | 1%  | 4%  | 1%  | 8%  |
| Overall         | 9%  | 9%  | 13% | 1% | 2% | 2%  | 0% | 0%  | 0% | 9%  | 7%       | 12%     | 6%  | 10%  | 9%  | 0%  | 5%  | 1%  | 6%  |
| StDev           | 3%  | 6%  | 9%  | 1% | 2% | 2%  | 1% | 1%  | 1% | 5%  | 8%       | 4%      | 4%  | 3%   | 4%  | 1%  | 2%  | 1%  | 3%  |
| 10th Percentile | 6%  | 1%  | 1%  | 0% | 0% | 0%  | 0% | 0%  | 0% | 1%  | 0%       | 7%      | 0%  | 6%   | 4%  | 0%  | 2%  | 0%  | 4%  |
| 90th Percentile | 11% | 15% | 22% | 2% | 4% | 5%  | 2% | 0%  | 2% | 15% | 10%      | 15%     | 11% | 15%  | 14% | 0%  | 7%  | 2%  | 11% |

Blank corrected Sea Water Mean MP counts

| Sample ID       | PE | PES | PET | PP  | PS  | PVC | PU  | ABS | PC | PVA | Nylon/PA | Acrylic | CE  | PMMA | PLS | Rbr | PLA | SBR | SAN |
|-----------------|----|-----|-----|-----|-----|-----|-----|-----|----|-----|----------|---------|-----|------|-----|-----|-----|-----|-----|
| SW1             | 0% | 0%  | 6%  | 0%  | 18% | 0%  | 4%  | 0%  | 0% | 18% | 0%       | 22%     | 0%  | 0%   | 10% | 0%  | 22% | 0%  | 0%  |
| SW2             | 0% | 28% | 0%  | 0%  | 0%  | 33% | 0%  | 0%  | 0% | 0%  | 28%      | 0%      | 11% | 0%   | 0%  | 0%  | 0%  | 0%  | 0%  |
| SW3             | 0% | 0%  | 11% | 22% | 0%  | 8%  | 11% | 0%  | 0% | 0%  | 0%       | 19%     | 19% | 8%   | 0%  | 0%  | 0%  | 0%  | 0%  |
| Overall         | 0% | 9%  | 6%  | 7%  | 6%  | 14% | 5%  | 0%  | 0% | 6%  | 9%       | 14%     | 10% | 3%   | 3%  | 0%  | 7%  | 0%  | 0%  |
| StDev           | 0% | 18% | 11% | 14% | 9%  | 31% | 11% | 0%  | 0% | 9%  | 18%      | 13%     | 15% | 8%   | 6%  | 0%  | 11% | 0%  | 0%  |
| 10th Percentile | 0% | 0%  | 0%  | 0%  | 0%  | 0%  | 0%  | 0%  | 0% | 0%  | 0%       | 0%      | 0%  | 0%   | 0%  | 0%  | 0%  | 0%  | 0%  |
| 90th Percentile | 0% | 37% | 20% | 33% | 18% | 40% | 17% | 0%  | 0% | 18% | 37%      | 27%     | 33% | 5%   | 13% | 0%  | 25% | 0%  | 0%  |

**Table S4. Particle size distribution (in percentages per bin) for *Melosira arctica*.** Particle size distribution values are derived using  $\mu$ -Raman identification of polymers and Nile Red Fluorescence microscopy for morphology descriptions.

| Particle size (count) | MP polymer % |       |       | Standard Deviation |       |       | Overall Mean | St Dev | 10th Percentile | 90th Percentile |
|-----------------------|--------------|-------|-------|--------------------|-------|-------|--------------|--------|-----------------|-----------------|
|                       | MEL_1        | MEL_2 | MEL_3 | MEL_1              | MEL_2 | MEL_3 |              |        |                 |                 |
| 1.6-2 $\mu$ m         | 7%           | 4%    | 31%   | 8%                 | 12%   | 14%   | 14%          | 12%    | 5%              | 27%             |
| 2-5 $\mu$ m           | 33%          | 35%   | 37%   | 3%                 | 2%    | 3%    | 35%          | 2%     | 34%             | 37%             |
| 1.6-5 $\mu$ m         | 40%          | 39%   | 69%   | 10%                | 9%    | 16%   | 49%          | 14%    | 39%             | 63%             |
| 5-10 $\mu$ m          | 48%          | 57%   | 29%   | 8%                 | 6%    | 4%    | 44%          | 12%    | 32%             | 55%             |
| 10-20 $\mu$ m         | 10%          | 0%    | 0%    | 2%                 | 0%    | 0%    | 3%           | 4%     | 0%              | 8%              |
| 20-30 $\mu$ m         | 0%           | 0%    | 0%    | 0%                 | 0%    | 0%    | 0%           | 0%     | 0%              | 0%              |
| 30-40 $\mu$ m         | 2%           | 4%    | 3%    | 1%                 | 1%    | 1%    | 3%           | 1%     | 2%              | 4%              |
| 40-50 $\mu$ m         | 0%           | 0%    | 0%    | 0%                 | 0%    | 0%    | 0%           | 0%     | 0%              | 0%              |
| 50-100 $\mu$ m        | 0%           | 0%    | 0%    | 0%                 | 0%    | 0%    | 0%           | 0%     | 0%              | 0%              |
| 100-150 $\mu$ m       | 0%           | 0%    | 0%    | 0%                 | 0%    | 0%    | 0%           | 0%     | 0%              | 0%              |
| 150-200 $\mu$ m       | 0%           | 0%    | 0%    | 0%                 | 0%    | 0%    | 0%           | 0%     | 0%              | 0%              |
| 200-250 $\mu$ m       | 0%           | 0%    | 0%    | 0%                 | 0%    | 0%    | 0%           | 0%     | 0%              | 0%              |
| 250-300 $\mu$ m       | 0%           | 0%    | 0%    | 0%                 | 0%    | 0%    | 0%           | 0%     | 0%              | 0%              |
| 300-350 $\mu$ m       | 0%           | 0%    | 0%    | 0%                 | 0%    | 0%    | 0%           | 0%     | 0%              | 0%              |
| 350-400 $\mu$ m       | 0%           | 0%    | 0%    | 0%                 | 0%    | 0%    | 0%           | 0%     | 0%              | 0%              |
| 400-450 $\mu$ m       | 0%           | 0%    | 0%    | 0%                 | 0%    | 0%    | 0%           | 0%     | 0%              | 0%              |

|                                       |     |    |    |    |    |    |    |    |    |    |
|---------------------------------------|-----|----|----|----|----|----|----|----|----|----|
| 450-500µm                             | 0%  | 0% | 0% | 0% | 0% | 0% | 0% | 0% | 0% | 0% |
| 500-550µm                             | 0%  | 0% | 0% | 0% | 0% | 0% | 0% | 0% | 0% | 0% |
| 550-600µm                             | 0%  | 0% | 0% | 0% | 0% | 0% | 0% | 0% | 0% | 0% |
| 600-650µm                             | 0%  | 0% | 0% | 0% | 0% | 0% | 0% | 0% | 0% | 0% |
| 650-700µm                             | 0%  | 0% | 0% | 0% | 0% | 0% | 0% | 0% | 0% | 0% |
| 700-750µm                             | 0%  | 0% | 0% | 0% | 0% | 0% | 0% | 0% | 0% | 0% |
| 750-800µm                             | 0%  | 0% | 0% | 0% | 0% | 0% | 0% | 0% | 0% | 0% |
| 800-850µm                             | 0%  | 0% | 0% | 0% | 0% | 0% | 0% | 0% | 0% | 0% |
| 850-900µm                             | 0%  | 0% | 0% | 0% | 0% | 0% | 0% | 0% | 0% | 0% |
| 900-950µm                             | 0%  | 0% | 0% | 0% | 0% | 0% | 0% | 0% | 0% | 0% |
| 950-1000µm                            | 0%  | 0% | 0% | 0% | 0% | 0% | 0% | 0% | 0% | 0% |
| 1000-2000µm                           | 0%  | 0% | 0% | 0% | 0% | 0% | 0% | 0% | 0% | 0% |
| 2000-3000µm                           | 0%  | 0% | 0% | 0% | 0% | 0% | 0% | 0% | 0% | 0% |
| 3000-4000µm                           | 0%  | 0% | 0% | 0% | 0% | 0% | 0% | 0% | 0% | 0% |
| 4000-5000µm                           | 0%  | 0% | 0% | 0% | 0% | 0% | 0% | 0% | 0% | 0% |
| Percentage fibres                     | 1%  | 3% | 4% |    |    |    |    |    |    |    |
| Percentage fibres in<br>blanks (mean) | 13% |    |    |    |    |    |    |    |    |    |

**Note. S1. Kruskal–Wallis test is the one-way analysis of variance between *Melosira arctica* MP sample sites for MP relative to wet sample weight, dry sample weight and sample volume (MP m<sup>-3</sup>). This one-factor, non-parametric ANOVA evaluates the differences between multiple independent sample sets based on ranks. The Kruskal-Wallis test is calculated following:**

$$H = \frac{12}{n(n+1)} \sum \left( \frac{R_j^2}{n_j} \right) - 3(n + 1) \quad \text{Eqn. 1}$$

Where:

H = hypothesis

n = total sample size across all groups

n<sub>j</sub> = sample size of group j

R<sub>j</sub> = rank sum of group j

**Total extrapolated filter count**

H = 3.115 < 5.692

p-value is 0.2083 > 0.05

Ho is not rejected. Therefore, there is not enough evidence to claim that not all population medians are equal, at the 0.05 significance level.

R (region of acceptance) = {H ≥ 5.692}

**MP/g (wet weight)**

H=8.346 ≥ 5.692

p-value is 0.0154 < 0.05

Ho is rejected. Therefore, there is enough evidence to claim that not all population medians are equal, at the 0.05 significance level.

**MP/g (dry weight)**

H=2.8077 < 5.692

p-value is 0.2457 > 0.05

H0 cannot be rejected. the difference between the mean ranks of all groups is not big enough to be statistically significant

**MP/m<sup>3</sup>**

H=8.3462 < 5.692

p-value is 0.0154 > 0.05

H0 is rejected. The difference between the mean ranks of some groups is big enough to be statistically significant.

**Note S2. t-Test of *Melosira arctica* individual samples to consider location specific differences and differences between *Melosira* and seawater samples.** t-Test analysis is used to help consider if there is a significant difference between sample location MP results, following:

$$t = \frac{\bar{x}_1 - \bar{x}_2}{\sqrt{s^2 \left( \frac{1}{n_1} + \frac{1}{n_2} \right)}} \quad \text{Eqn. 2}$$

Where:

t = t-value

n = number of observations in the group

x = means of the groups

Mean of Mel vs Mean of SW

|  |                                     |                                             |
|--|-------------------------------------|---------------------------------------------|
|  | t-Test: Paired Two Sample for Means | t-Test: Two-Sample Assuming Equal Variances |
|--|-------------------------------------|---------------------------------------------|

|        |          |          |
|--------|----------|----------|
| t(3) = | 2.217092 | 2.064296 |
|--------|----------|----------|

|           |          |          |
|-----------|----------|----------|
| p value = | 0.078457 | 0.053963 |
|-----------|----------|----------|

|        |                       |                             |
|--------|-----------------------|-----------------------------|
| t-test | Total Mel vs total SW | Total Mel vs total SW <25µm |
|--------|-----------------------|-----------------------------|

t(9) = -3.75239 4.04634  
 p value = 0.00627 0.00315

t-test Mel\_1+SW\_1 vs Mel\_2+SW\_2 Mel\_1+SW\_1 vs Mel\_3+SW\_3 Mel\_2+SW\_2 vs Mel\_3+SW\_3  
 t(6) = 2.36515 1.66468 -1.11649  
 p value = 0.017122 0.060924 0.142211

t-test Mel1 wet vs dry Mel2 wet vs dry Mel3 wet vs dry Mel total wet vs dry  
 t(3) = -4.71867 -2.4069 -4.2471 -6.11734  
 p value = 0.001631 0.026398 0.002699 < 0.0001

**Note S3. Correlation and simple linear regression analysis of *Melosira* and sea water samples.**

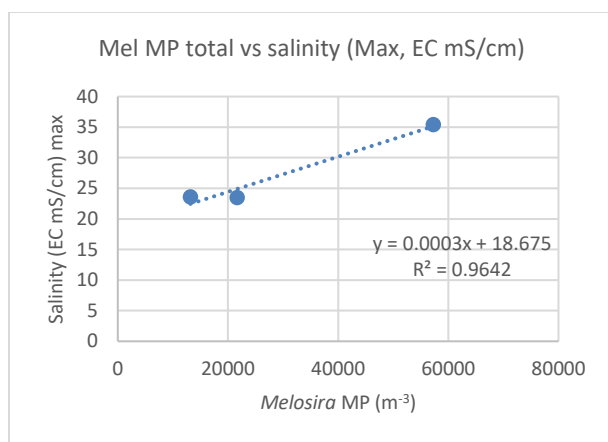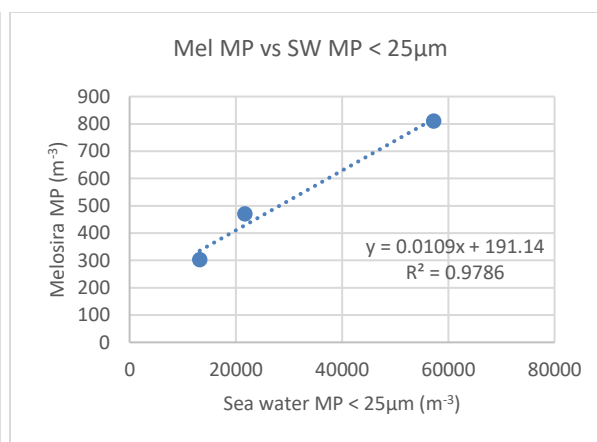

|                  | <i>Melosira</i> MP (m <sup>-3</sup> ) |       |          |        | Sea Water MP (m <sup>-3</sup> ) |         |         | Ice thickness (m) | Salinity (EC mS/cm) min | Salinity (EC mS/cm) max |
|------------------|---------------------------------------|-------|----------|--------|---------------------------------|---------|---------|-------------------|-------------------------|-------------------------|
|                  | <10µm                                 | <20µm | 1.6-5 µm | 5-10µm | Total                           | MP>25µm | MP<25µm |                   |                         |                         |
| One-tailed       |                                       |       |          |        |                                 |         |         |                   |                         |                         |
| t(2) =           | 2.28                                  | 2.28  | 2.25     | 2.28   | 2.06                            | 2.10    | 2.24    | 2.28              | 2.27                    | 2.27                    |
| p =              | 0.04                                  | 0.04  | 0.43     | 0.43   | 0.05                            | 0.05    | 0.04    | 0.04              | 0.04                    | 0.04                    |
| Two-tailed       |                                       |       |          |        |                                 |         |         |                   |                         |                         |
| t(2) =           | 2.28                                  | 2.28  | 2.28     | 2.28   | 2.06                            | 2.10    | 2.24    | 2.28              | 2.27                    | 2.27                    |
| p =              | 0.09                                  | 0.09  | 0.85     | 0.09   | 0.11                            | 0.10    | 0.09    | 0.09              | 0.09                    | 0.09                    |
| r =              | -0.94                                 | 0.81  | -0.30    | 0.02   | 0.99                            | 0.98    | 0.99    | 0.49              | -0.30                   | 0.98                    |
| R <sup>2</sup> = | 0.89                                  | 0.65  | 0.09     | 0.00   | 0.97                            | 0.97    | 0.98    | 0.24              | 0.09                    | 0.96                    |

**Note S4. Positive control tests.**

|                    | Particle count | Expected # | Analytical efficiency |
|--------------------|----------------|------------|-----------------------|
| Positive control 1 | 33             | 34         | 97%                   |
| Positive control 2 | 59             | 67         | 88%                   |
| Positive control 3 | 93             | 134        | 69%                   |
| Positive control 4 | 25             | 25         | 100%                  |
| Average            |                |            | 89%                   |
| Standard deviation |                |            | 12%                   |
| Positive control 5 | 284            | 296        | 96%                   |
| Positive control 6 | 565            | 593        | 95%                   |
| Positive control 7 | 82             | 111        | 74%                   |
| Positive control 8 | 77             | 111        | 69%                   |
| Positive control 9 | 24             | 25         | 96%                   |
| Average            |                |            | 86%                   |
| Standard deviation |                |            | 12%                   |

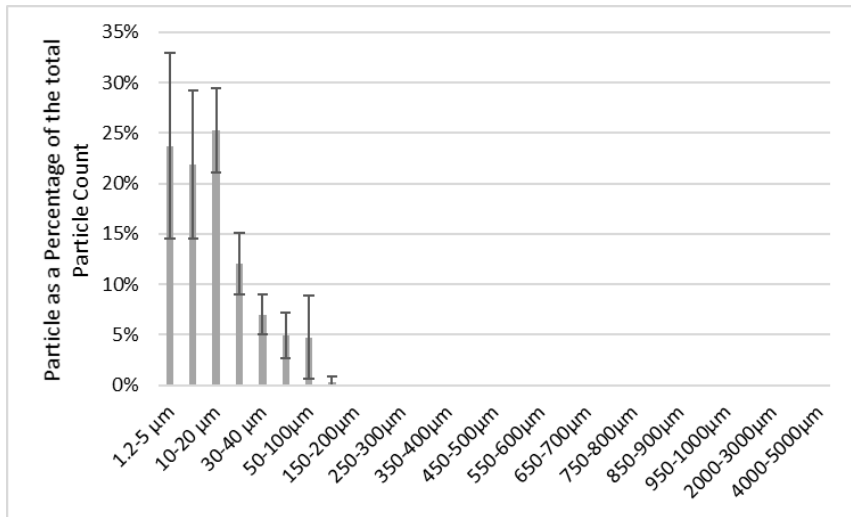

Particle size distribution of the control MP spike particles (polyethylene fragments, non-spherical).
